# Supplementary material for: Towards a Long-Read Sequencing Approach for the Molecular Diagnosis of RPGRORF15 Genetic Variants
Source: MDPI journal article supplement (doi:10.3390/ijms242316881), 2023-11-28
Supplement: s1 [file s1]

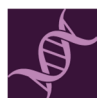

*Supplementary Material*

**Table S1.** NGS sequencing coverage of RPGR orf15 exon in the analyzed samples. When a specific coverage was not identified in any patient, “/” was reported as Mean exone target hole.

| Coverage range | Mean exone target hole (bp) | Number of patients |
|----------------|-----------------------------|--------------------|
| 47.5-50.0 %    | 899                         | 1                  |
| 50.0-52.5 %    | 845                         | 5                  |
| 52.5-55.0 %    | 800                         | 8                  |
| 55.0-57.5 %    | 754                         | 19                 |
| 57.5-60.0 %    | 709                         | 22                 |
| 60.0-62.5 %    | 669                         | 12                 |
| 62.5-65.0 %    | 623                         | 7                  |
| 65.0-67.5 %    | 599                         | 1                  |
| 67.5-70.0 %    | /                           | 0                  |
| 70.0-72.5 %    | /                           | 0                  |
| 72.5-75.0 %    | /                           | 0                  |
| 75.0-77.5 %    | /                           | 0                  |
| 77.5-80.0 %    | /                           | 0                  |
| 80.0-82.5 %    | 329                         | 2                  |

[illegible]

**Figure S1.** RPGRORF15 exon 15 sequence on Ensembl database. Colored residues represent residues in which genetic variants are found (ORF15 is a mutation hotspot of RPGR). Light blue: 3 prime UTR variants; Green: Coding sequence variants; Violet: Frameshift variants; Pink: Inframe deletions variants; Yellow: Missense variants; Dark Pink: Protein altering variants; Orange: Splice donor variants; Light orange: Splice region variants; Red: Stop gained variants; Light green: Synonymous variants.

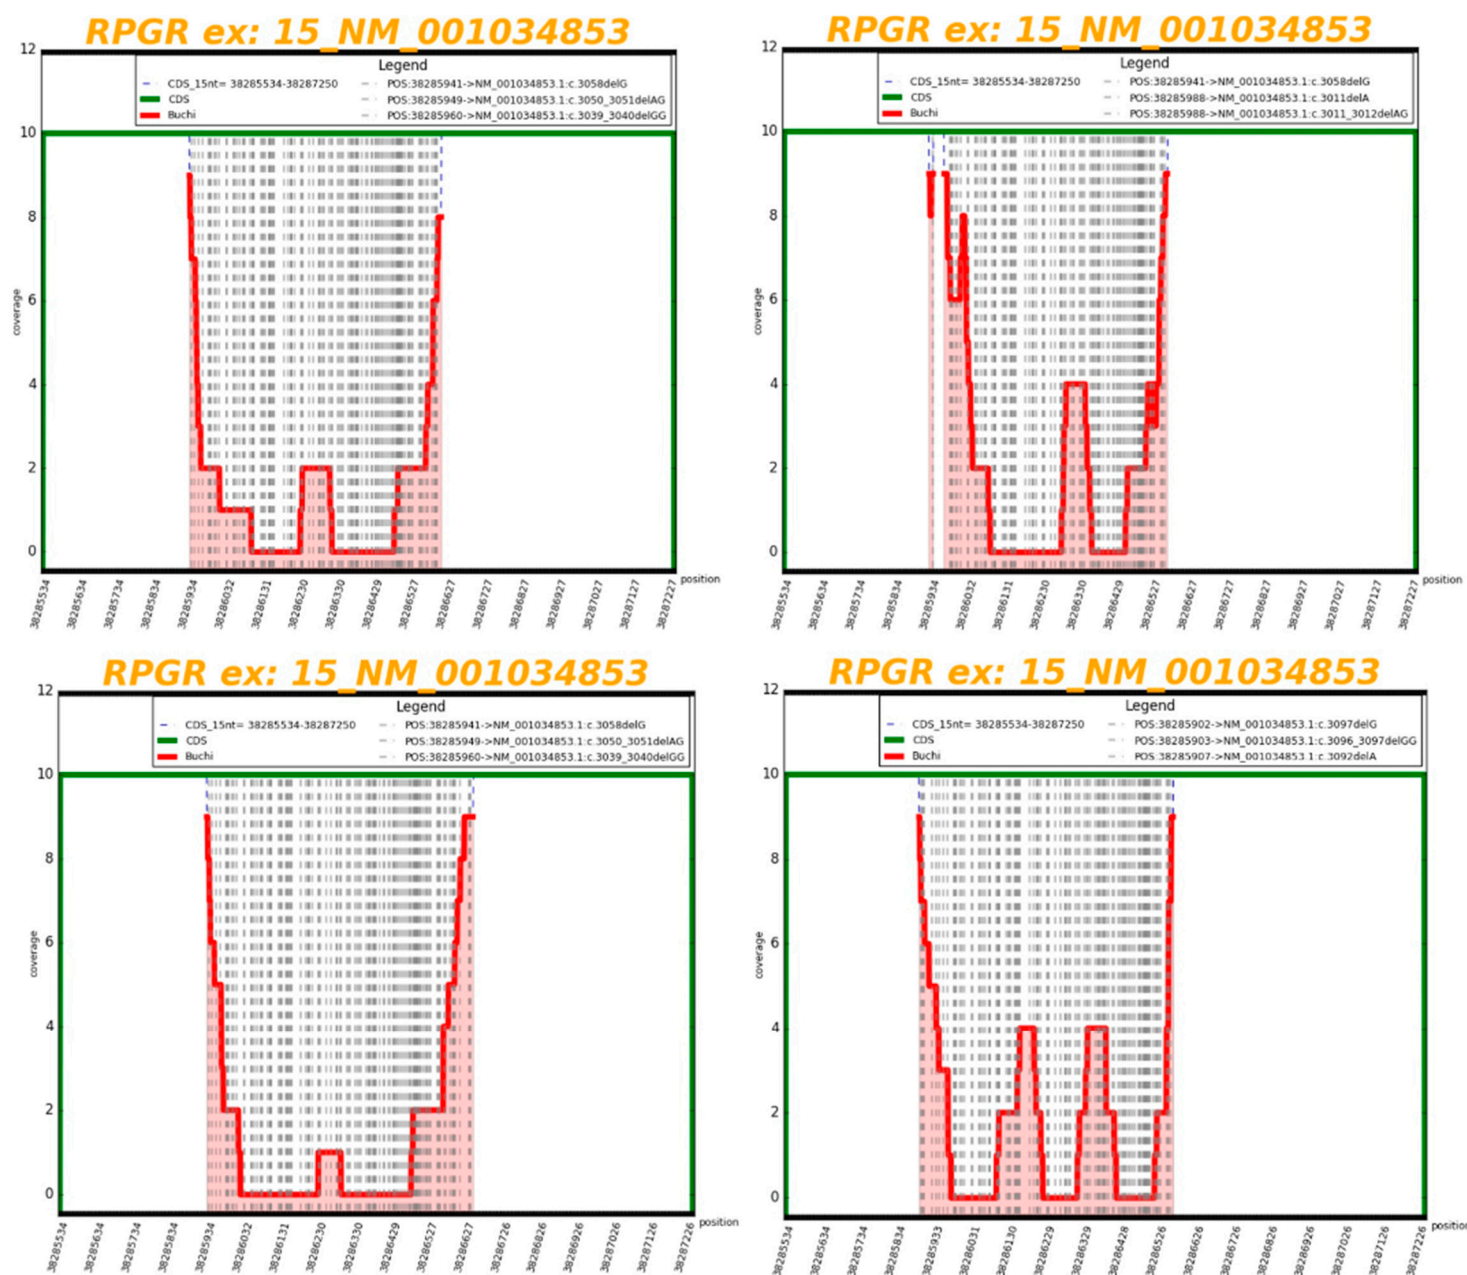

**Figure S2.** Examples of NGS sequencing coverage pitfalls in RPGRORF15 exon 15. Average coverage of RPGR is 60X, while orf15 region has a coverage lower than 10X. X axes represent nucleotide position, while Y axes represent coverage.

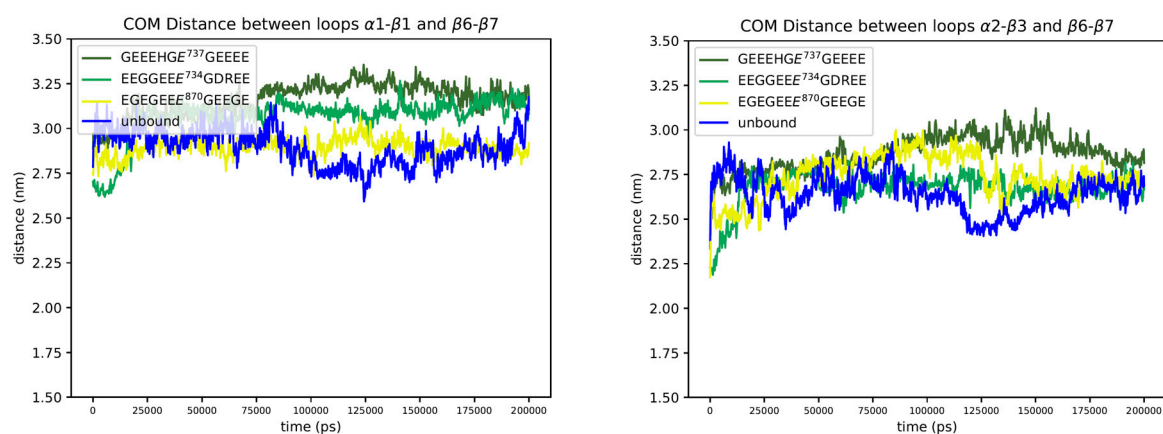

**Figure S3.** COM distance between the respective loops forming the binding cavity. Both the distances conform to a narrow stance in the free (unbound) TTL5 as compared to the bound complex.
